# Supplementary material for: Polysaccharides from Brasenia schreberi with Great Antioxidant Ability and the Potential Application in Yogurt
Source: MDPI journal article supplement (doi:10.3390/molecules29010150), 2023-12-26
Supplement: s1 [file s1]

---

Supplementary Table 1 Box-Behnken design of the response surface method

| Runs | Concentration of<br>enzyme (A) | pH value<br>(B) | Temperature<br>(C) | Enzymatic<br>hydrolysis<br>rate (%) |
|------|--------------------------------|-----------------|--------------------|-------------------------------------|
| 1    | 55                             | 3.5             | 60                 | 6.69711                             |
| 2    | 35                             | 3               | 50                 | 5.96157                             |
| 3    | 45                             | 4               | 60                 | 6.83077                             |
| 4    | 45                             | 3.5             | 50                 | 6.68243                             |
| 5    | 55                             | 3               | 50                 | 6.04208                             |
| 6    | 45                             | 3.5             | 50                 | 6.80991                             |
| 7    | 35                             | 4               | 50                 | 5.99912                             |
| 8    | 45                             | 3.5             | 50                 | 6.90263                             |
| 9    | 55                             | 4               | 50                 | 6.07437                             |
| 10   | 45                             | 3.5             | 50                 | 6.66852                             |
| 11   | 45                             | 3               | 40                 | 5.65492                             |
| 12   | 45                             | 4               | 40                 | 5.56753                             |
| 13   | 45                             | 3               | 60                 | 6.7821                              |
| 14   | 35                             | 3.5             | 60                 | 6.53949                             |
| 15   | 45                             | 3.5             | 50                 | 6.73574                             |
| 16   | 55                             | 3.5             | 40                 | 5.80086                             |
| 17   | 35                             | 3.5             | 40                 | 5.67106                             |

---

---

Supplementary Table 2   Sensory evaluation standards for polysaccharide  
yoghurt

| item                        | marking criterion                                               | score |
|-----------------------------|-----------------------------------------------------------------|-------|
| taste                       | soft taste, no graininess, moderate sweet and sour              | 20    |
| organizational<br>structure | uniform curd, fine texture, no cracks, no whey<br>precipitation | 20    |
| color                       | uniform color, milky white and yellowish                        | 20    |
| flavor                      | a strong aroma, a harmonious smell, and no<br>peculiar smell    | 20    |
| favorite                    | like it very much                                               | 20    |

---

Supplementary Table 3 Factors and levels of orthogonal experiment of polysaccharide yoghurt

| level | Addition of<br>polysaccharides %(A) | Addition of<br>sucrose %(B) | Fermentation time<br>h(C) |
|-------|-------------------------------------|-----------------------------|---------------------------|
| 1     | 0.1                                 | 5                           | 5                         |
| 2     | 0.15                                | 6                           | 5.5                       |
| 3     | 0.2                                 | 7                           | 6                         |

| Supplementary Table 4 Screening of degrading enzymes |     |                     |                         |
|------------------------------------------------------|-----|---------------------|-------------------------|
| Kinds of enzymes                                     | pH  | Temperature<br>(°C) | enzymolysis rate<br>(%) |
| pectinase                                            | 4   | 50                  | 4.65±0.15               |
| diastatic enzyme                                     | 4.5 | 60                  | 4.1±0.06                |
| a-amylase                                            | 6.4 | 60                  | 2.32±0.11               |
| cellulase                                            | 5   | 60                  | 1.29±0.04               |
| Papain protein enzyme                                | 6   | 55                  | 0.46±0.01               |

---

Supplementary Table 5 Results of orthogonal experiment

| Runs | Addition of<br>polysaccharides (A) | Addition of<br>sucrose (B) | Fermentation<br>time (C) | Error<br>list | Sensory<br>score |
|------|------------------------------------|----------------------------|--------------------------|---------------|------------------|
| 1    | 1                                  | 1                          | 1                        | 1             | 79               |
| 2    | 1                                  | 2                          | 2                        | 2             | 84               |
| 3    | 1                                  | 3                          | 3                        | 3             | 81               |
| 4    | 2                                  | 1                          | 2                        | 3             | 82               |
| 5    | 2                                  | 2                          | 3                        | 1             | 86               |
| 6    | 2                                  | 3                          | 1                        | 2             | 81               |
| 7    | 3                                  | 1                          | 3                        | 2             | 80               |
| 8    | 3                                  | 2                          | 1                        | 3             | 83               |
| 9    | 3                                  | 3                          | 2                        | 1             | 81               |
| K1   | 81.33                              | 80.33                      | 81.00                    | 82            |                  |
| K2   | 83.00                              | 84.67                      | 82.33                    | 81.67         |                  |
| K3   | 81.33                              | 81.00                      | 82.33                    | 82            |                  |
| k1   | 27.11                              | 26.78                      | 27                       | 27.33         |                  |
| k2   | 27.67                              | 28.22                      | 27.44                    | 27.22         |                  |
| k3   | 27.11                              | 27                         | 27.44                    | 27.33         |                  |
| R    | 1.67                               | 4                          | 1.33                     | 0.33          |                  |

---

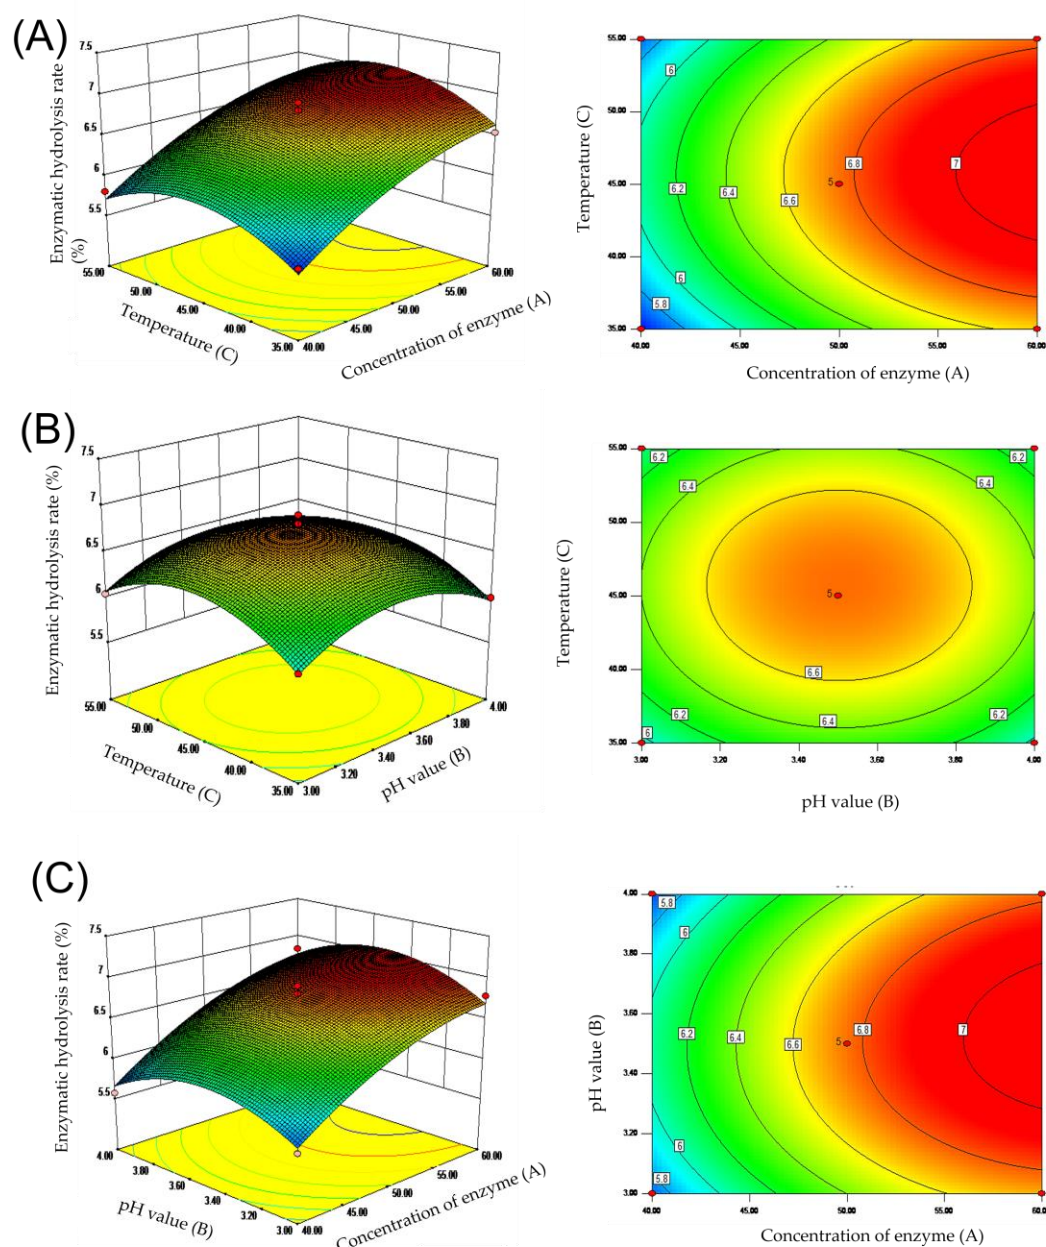

Supplementary Figure 1. The interaction of three factors on the enzymatic hydrolysis rate, including (A) the interaction of temperature and concentration of enzyme, (B) the interaction of pH value and temperature and (C) the interaction of pH value and concentration of enzyme.
